# Supplementary material for: Synthesis and luminescence of Al based double perovskite quantum dots
Source: Royal Society of Chemistry journal article supplement (doi:10.1039/d4qm00967c), 2025-01-01
Supplement: d4qm00967c1.pdf [file d4qm00967c1.pdf]

# Supporting Information

## Synthesis and luminescence of Al based double perovskite quantum dots

Liyuan Zhang,<sup>a,#</sup> Chasina Wang<sup>a,#</sup> and Chuanlang Zhan<sup>\*a</sup>

Key Laboratory of Advanced Materials Chemistry and Devices (AMCDLab) of the Department of Education of Inner Mongolia Autonomous Region, College of Chemistry and Environmental Science, Inner Mongolia Normal University, Huhhot 010022, China.

Corresponding author: [clzhan@imnu.edu.cn](mailto:clzhan@imnu.edu.cn)

### Supporting information

#### 1 Reagents and instruments

##### 1.1 Reagents

Cesium Acetate, 98%, Shanghai BiDe PharmaTech; Silver Acetate, >98%, Shanghai BiDe PharmaTech; Sodium Acetate, >98%, Shanghai BiDe PharmaTech; Aluminum Acetate, Analytically Pure, Bismuth Acetate, 98%, Shanghai BiDe PharmaTech Shandong West Asia Chemical Co. Ltd; ammonium oleate, analytical pure, Shanghai Aladdin Biochemical Technology Co., Ltd; octadecene, analytical pure, Beijing Anegi Energy Engineering Technology Co. n-trioctylphosphine, 98%, Shanghai Aladdin Biochemical Technology Co., Ltd; The above drugs are used directly without special treatment.

##### 1.2 Instrumentation

Lambda 1050+ UV-Vis NIR spectrophotometer, PerkinElmer, USA; FLS1000 Steady transient fluorescence spectrometer, Edinburgh, UK; F200 projection electron

microscope, Nippon Electron Corporation; ES CALAB 250Xi X-ray photoelectron spectrometer, Thermo Fisher Scientific, USA.

## 2 Experimental section

### 2.1 Synthesis of Cs<sub>2</sub>AgAlCl<sub>6</sub> QDs.

CsOAc, In(OAc)<sub>3</sub>, Al(OAc)<sub>3</sub> and AgOAc were loaded into a two-necked round-bottomed flask, and three pumping and three releasing (pumping three times of vacuum and filling three times of nitrogen, alternately) were carried out in an oxygen-free and water-free operating system, and a nitrogen balloon was inserted into one end of the two-necked round-bottomed flask as a protective gas. Then ODE, oleic acid OA, oleylamine OAm were injected, and the temperature was heated to 110 °C until all the raw materials were dissolved. The temperature was continued to 155 °C, and TMS-Cl was injected immediately when the temperature rose to 155 °C, and the reaction was carried out for 30 s. The reaction was then subjected to an ice bath and cooled to room temperature. The product was transferred to a 10 ml centrifuge tube and centrifuged at 8000 rpm for 10 min, the supernatant was discarded, and then the precipitate was dissolved in n-hexane and centrifuged at 8000 rpm for 10 min, the supernatant was taken and the precipitate was discarded. The supernatant was removed and the precipitate was discarded. The hexane was evaporated at 69 °C and concentrated. Subsequently, an equal amount of ethyl acetate was added for purification. The final precipitate was collected by centrifugation at 8000 rpm for 10 min.

### 2.2 Synthesis of Cs<sub>2</sub>NaAlCl<sub>6</sub> QDs.

CsOAc, In(OAc)<sub>3</sub>, Al(OAc)<sub>3</sub> and NaOAc were loaded into a two-necked round-bottomed flask, and three pumping and three releasing (pumping three times of vacuum and filling three times of nitrogen, alternately) were carried out in an oxygen-free and water-free operating system, and a nitrogen balloon was inserted into one end of the two-necked round-bottomed flask as a protective gas. Then ODE, oleic acid OA, oleylamine OAm were injected, and the temperature was heated to 110 °C until all the raw materials were dissolved. The temperature was continued to 155 °C, and TMS-Cl was injected immediately when the temperature rose to 155 °C, and the reaction was carried out for 30 s. The reaction was then subjected to an ice bath and cooled to room temperature. The product was transferred to a 10 ml centrifuge tube and centrifuged at 8000 rpm for 10 min, the supernatant was discarded, and then the precipitate was dissolved in n-hexane and centrifuged at 8000 rpm for 10 min, the supernatant was

taken and the precipitate was discarded. The supernatant was removed and the precipitate was discarded. The hexane was evaporated at 69 °C and concentrated. Subsequently, an equal amount of ethyl acetate was added for purification. The final precipitate was collected by centrifugation at 8000 rpm for 10 min.

### 2.3 Synthesis of Bi-Cs<sub>2</sub>AgAlCl<sub>6</sub> QDs (20%,40%,60%,80%,100%).

CsOAc, Al(OAc)<sub>3</sub>, AgOAc and Bi(OAc)<sub>3</sub> (20%,40%,60%,80%,100%) were loaded into a two-necked round-bottomed flask, and three pumping and three releasing (pumping three times of vacuum and filling three times of nitrogen, alternately) were carried out in an oxygen-free and water-free operating system, and a nitrogen balloon was inserted into one end of the two-necked round-bottomed flask as a protective gas. Then ODE, oleic acid (OA), oleylamine (OAm) were injected, and the temperature was heated to 110 °C until all the raw materials were dissolved. The temperature was continued to 155 °C, and TMS-Cl was injected immediately when the temperature rose to 155 °C, and the reaction was carried out for 30 s. The reaction was then subjected to an ice bath and cooled to room temperature. The product was transferred to a 10 ml centrifuge tube and centrifuged at 8000 rpm for 10 min, the supernatant was discarded, and then the precipitate was dissolved in n-hexane and centrifuged at 8000 rpm for 10 min, the supernatant was taken and the precipitate was discarded. The supernatant was removed and the precipitate was discarded. The hexane was evaporated at 69 °C and concentrated. Subsequently, an equal amount of ethyl acetate was added for purification. The final precipitate was collected by centrifugation at 8000 rpm for 10 min.

### 2.4 Synthesis of Bi-Cs<sub>2</sub>NaAlCl<sub>6</sub> QDs (20%,40%,60%,80%,100%).

CsOAc, Al(OAc)<sub>3</sub>, NaOAc and Bi(OAc)<sub>3</sub> (20%,40%,60%,80%,100%) were loaded into a two-necked round-bottomed flask, and three pumping and three releasing (pumping three times of vacuum and filling three times of nitrogen, alternately) were carried out in an oxygen-free and water-free operating system, and a nitrogen balloon was inserted into one end of the two-necked round-bottomed flask as a protective gas. Then ODE, OA, OAm were injected, and the temperature was heated to 110 °C until all the raw materials were dissolved. The temperature was continued to 155 °C, and TMS-Cl was injected immediately when the temperature rose to 155 °C, and the reaction was carried out for 30 s. The reaction was then subjected to an ice bath and cooled to room temperature. The product was transferred to a 10 ml centrifuge tube and centrifuged at 8000 rpm for 10 min, the supernatant was discarded, and then the

precipitate was dissolved in n-hexane and centrifuged at 8000 rpm for 10 min, the supernatant was taken and the precipitate was discarded. The supernatant was removed and the precipitate was discarded. The hexane was evaporated at 69 °C and concentrated. Subsequently, an equal amount of ethyl acetate was added for purification. The final precipitate was collected by centrifugation at 8000 rpm for 10 min.

### 2.5 Synthesis of TOP-Cs<sub>2</sub>AgAlCl<sub>6</sub> QDs (20%,40%,60%,80%).

CsOAc, Al(OAc)<sub>3</sub>, AgOAc were loaded into a two-necked round-bottomed flask, and three pumping and three releasing (pumping three times of vacuum and filling three times of nitrogen, alternately) were carried out in an oxygen-free and water-free operating system, and a nitrogen balloon was inserted into one end of the two-necked round-bottomed flask as a protective gas. Then ODE, OA and n-triethylphosphine TOP (20%, 40%, 60%, 80%), OAm (80%, 60%, 40%, 20%) were injected, and the temperature was heated to 110 °C until all the raw materials were dissolved. The temperature was continued to 155 °C, and TMS-Cl was injected immediately when the temperature rose to 155 °C, and the reaction was carried out for 30 s. The reaction was then subjected to an ice bath and cooled to room temperature. The product was transferred to a 10 ml centrifuge tube and centrifuged at 8000 rpm for 10 min, the supernatant was discarded, and then the precipitate was dissolved in n-hexane and centrifuged at 8000 rpm for 10 min, the supernatant was taken and the precipitate was discarded. The supernatant was removed and the precipitate was discarded. The hexane was evaporated at 69 °C and concentrated. Subsequently, an equal amount of ethyl acetate was added for purification. The final precipitate was collected by centrifugation at 8000 rpm for 10 min.

### 3. Supporting figures

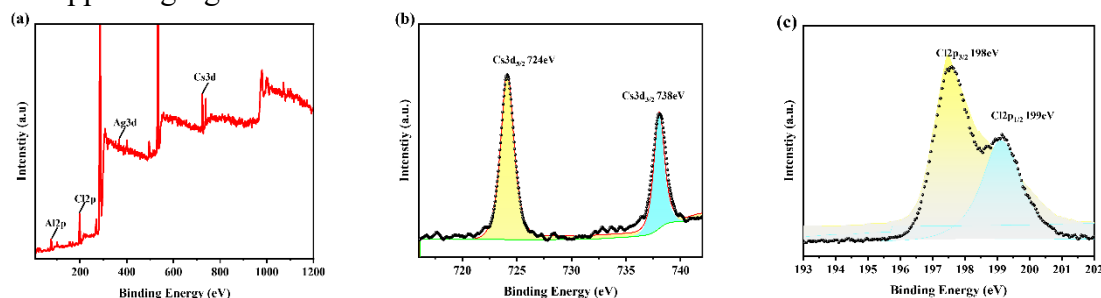

**Figure S1** Cs<sub>2</sub>AgAlCl<sub>6</sub> QDs: (a) XPS full spectrum, (b c) XPS fine spectra corresponding to Cs 3d, and C 1s, respectively

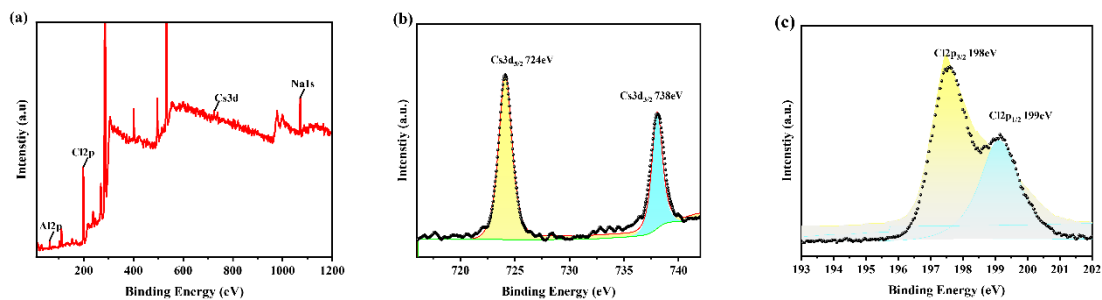

**Figure S2** Cs<sub>2</sub>NaAlCl<sub>6</sub> QDs: (a) XPS full spectrum, (b c) XPS fine spectra corresponding to Cs 3d, and Cl 2p, respectively

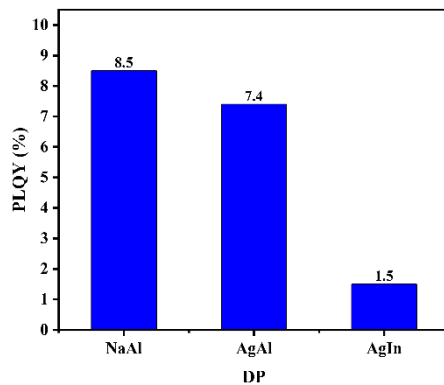

**Figure S3** PLQYs of Cs<sub>2</sub>AgAlCl<sub>6</sub>, Cs<sub>2</sub>NaAlCl<sub>6</sub> and Cs<sub>2</sub>AgInCl<sub>6</sub> QDs, respectively.
